# Supplementary material for: The Bead Assay for Biofilms: A Quick, Easy and Robust Method for Testing Disinfectants
Source: PubMed Central journal article supplement (PMC4912112; doi:10.1371/journal.pone.0157663), 2016-06-17

# BEAD ASSAY FOR BIOFILMS

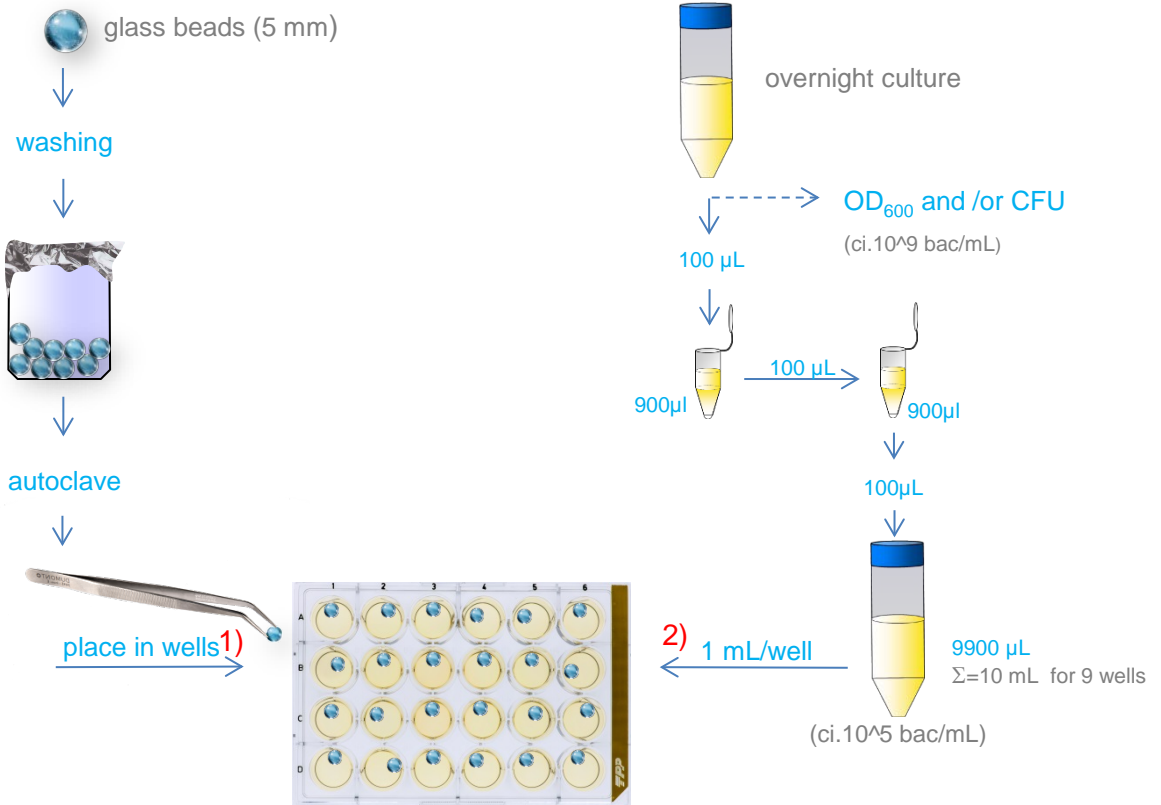

↓ place in container (+ 2 wet paper towels)

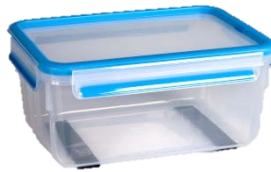

↓ place on orbital shaker

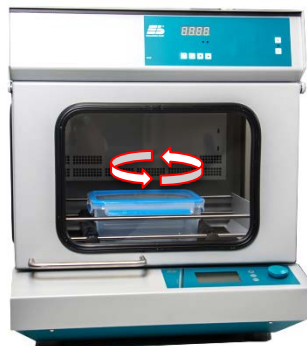

24 h, 37° C, 150 rpm

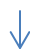

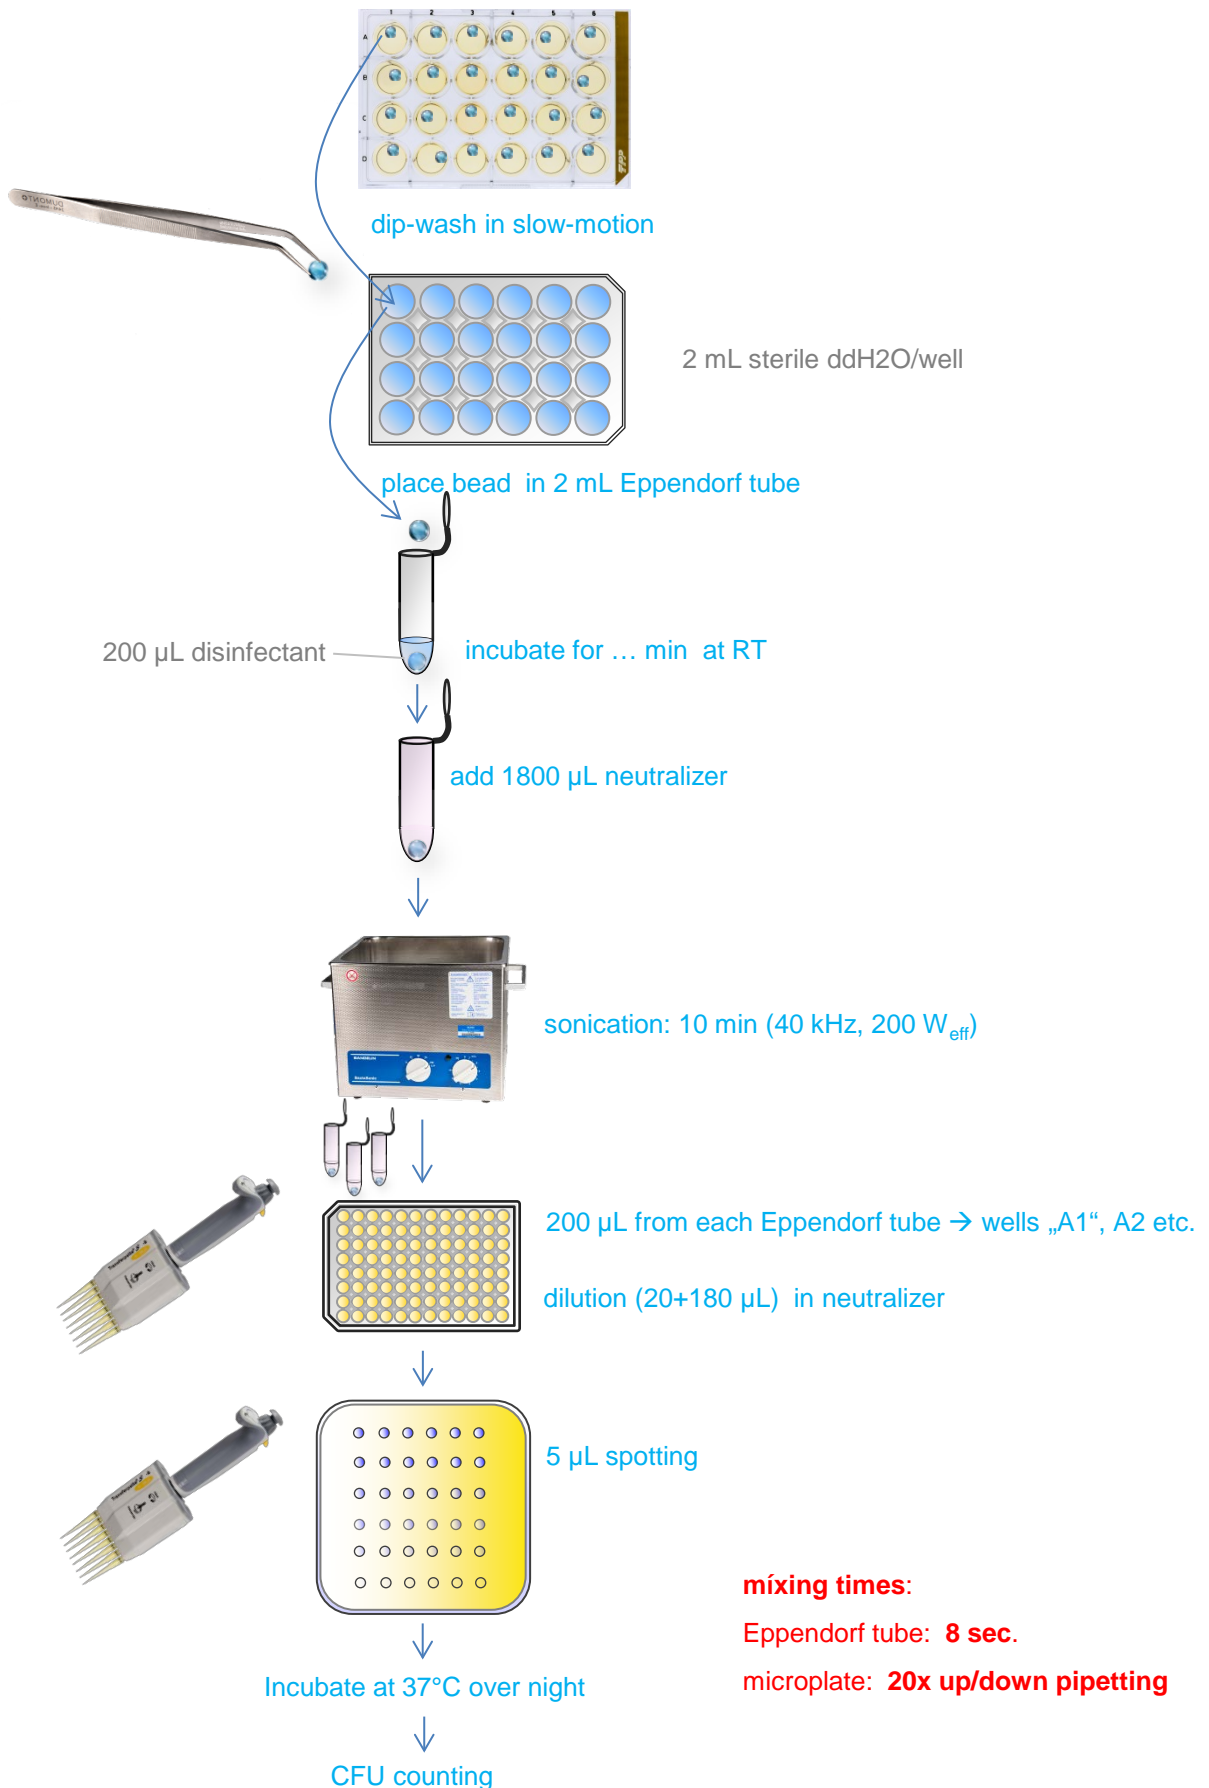

Supplement: pone.0157663.s001.pdf [file pone.0157663.s001.pdf]
